# Supplementary material for: Mathematical Modeling and Analyses of Interspike-Intervals of Spontaneous Activity in Afferent Neurons of the Zebrafish Lateral Line
Source: PubMed Central journal article supplement (PMC6173758; doi:10.1038/s41598-018-33064-z), 2018-10-05
Supplement: 41598_2018_33064_MOESM1_ESM.pdf [file 41598_2018_33064_MOESM1_ESM.pdf]

# Supplementary Materials

## Mathematical Modeling and Analyses of Interspike-Intervals of Spontaneous Activity in Afferent Neurons of the Zebrafish Lateral Line

Sangmin Song<sup>1</sup>, Ji Ah Lee<sup>2</sup>, Ilya Kiselev<sup>1</sup>, Varun Iyengar<sup>1</sup>, Josef Trapani<sup>1</sup>, and Nessay Tania<sup>2,\*</sup>

<sup>1</sup>Department of Biology, Amherst College, Amherst, MA 01002, USA

<sup>2</sup>Department of Mathematics and Statistics, Smith College, Northampton, MA 01063, USA

\*ntania@smith.edu

### Renewal Process Models

#### Model Formulation

We model spike (action potential) generation as a renewal process consisting of two steps. A spike is generated if the afferent neuron is recovered *and* a synaptic release from hair cells (excitatory input) has occurred. Following an action potential, a neuron cannot immediately spike again and first undergoes a refractory period. We assumed that the refractory period consists of a constant absolute-refractory period followed by a relative refractory period. The duration of the absolute-refractory period,  $t_{abs}$ , is assumed to be a fixed constant that corresponds to the minimal time period before the neuron can undergo another action potential. The relative-refractory period,  $t_{rel}$ , is a random variable generated according to an exponential distribution with rate  $\lambda_R$ . Thus, the probability density function for the total refractory period is given by

$$f_R(t) = \begin{cases} 0 & \text{for } t < t_{abs}, \\ \lambda_R \exp(-\lambda_R(t - t_{abs})) & \text{for } t \geq t_{abs}. \end{cases} \quad (S1)$$

Once the neuron is recovered, it will remain at rest until a synaptic release arrives. This time to excitation,  $t_E$ , follows a probability distribution function  $f_E(t)$ ; we considered three different distributions that qualitatively describe distinct mechanisms as discussed in the main article.

1. Exponential distribution with rate  $\lambda_E$ ,

$$f_E(t) = \lambda_E \exp(-\lambda_E t). \quad (S2)$$

2. Mixture of Gamma and exponential distributions,

$$f_E(t) = p \left( \lambda_E \exp(-\lambda_E t) \right) + (1 - p) \left( \frac{\lambda_E^n}{\Gamma(n)} t^{n-1} \exp(-\lambda_E t) \right). \quad (S3)$$

The first term represents a fraction  $p$  of the excitation times generated by an exponential distribution with rate  $\lambda_E$ , while the second term represents the remaining fraction  $(1 - p)$  generated by a gamma distribution with shape parameter  $n$  and rate  $\lambda_E$ .

3. Mixture of exponential distributions,

$$f_E(t) = p \left( \lambda_{E1} \exp(-\lambda_{E1} t) \right) + (1 - p) \left( \lambda_{E2} \exp(-\lambda_{E2} t) \right). \quad (S4)$$

Here, we assume two independent sources of excitation times both of which exponentially distributed; the first source has rate  $\lambda_{E1}$  and probability  $p$ , the second with rate  $\lambda_{E2}$  and probability  $1 - p$ .

By combining the distributions of refractory and excitation time, the probability density function for ISI,  $t = t_{abs} + t_{rel} + t_E$ , can be written by conditioning over possible total refractory time  $t_R$ ,

$$f_{ISI}(t) = \int_{t_{abs}}^t f_R(t_R) f_E(t - t_R) dt_R. \quad (S5)$$

## Least-Square Data Fitting

Parameter fitting to different  $f_{ISI}$  distributions above was completed via least-square minimizations on the cumulative distribution functions (antiderivatives of  $f_{ISI}(t)$  (S5)). Our fitting procedure was similar to that outlined in Heil, et al. (2007). The absolute refractory period  $t_{abs}$  is assumed to be a constant whose value is the smaller of either  $0.9 \times$  shortest ISI or 2.5 ms. For fitting to different excitation time distributions  $f_E(t)$ , we first performed data fitting for the exponentially distributed  $f_E$  (case (i)). This data-fitting results were then used as initial guesses for the more complicated mixture models. More specifically, we used the following initial guesses to start the least square minimization (implemented using lsqnonlin in Matlab):

1. Exponential distribution for  $f_E(t)$

We used the same choice of initial guesses as in Heil, et al. (2007).

$$\lambda_E^0 = \frac{1}{\text{mean ISI} - t_{abs}}, \quad \lambda_R^0 = \sqrt{\max\{0, 1/(\text{Var}(\text{ISI}) - 1/\lambda_E^0)\}}$$

Note that the result obtained by solving the convolution integral for  $f_{ISI}$  does not distinguish between  $\lambda_E$  and  $\lambda_R$ , i.e. interchanging the rates used in  $f_E(t)$  and  $f_R(t)$  yields the same expression for  $f_{ISI}(t)$ . Following data-fitting, we took the larger of the rates to be  $\lambda_R$  ( $\lambda_E < \lambda_R$ ) giving a range of total refractory time (absolute plus relative) of  $\sim 2 - 12$  ms. The resulting best-fit refractory parameters  $\lambda_R$  and  $t_{abs}$  were then used for the two mixture models below to limit the degree of freedom in data-fitting.

2. Mixture of Gamma and exponential distributions

For initial guesses, we used the values of  $\lambda_E, \lambda_R$  from fitting to the exponential  $f_E(t)$ , a random number between 1 and 4 for the shape parameter  $n$ , and a random number, uniformly distributed between 0 and 1 for  $p$ . We tested 100 sets of initial guess values and ran least square optimization. The final parameter set with the smallest sum of square difference was chosen as the best-fit parameter.

3. Mixture of exponential distributions

Initial guesses for the parameters were obtained from the results from fitting to the exponential  $f_E(t)$ : initially,  $\lambda_{E1}$  was set to  $\lambda_E$  obtained from the exponential data-fitting,  $\lambda_{E2}$  was obtained by multiplying  $\lambda_E$  (from exponential data-fitting) by a random number from 0 to 10, and  $p$  was initially set to a random number between 0 and 1. We again tested 100 sets of initial guesses and ran least square optimization from each. The final parameter set with the smallest sum of square difference was chosen as the best-fit parameter.

Best fit parameter values for each models are listed in Tables 1-3.

## Model Evaluations

Once parameter fitting was done, we compared the CDF difference (SSD columns in Tables 1-3) and found that the CDF difference is smallest, across all data sets, for the mixed exponential CDF (case (iii)). We further tested this by performing one-tailed two-sample t-tests with the following alternative-hypothesis (null hypothesis that SSD are the same):

- $H_1$  : SSD for exponential < SSD for mixed Gamma-exponential - rejected,  $p = 0.0547$ ,
- $H_1$  : SSD for exponential < SSD for mixed exponentials - accepted,  $p = 0.0017$ ,
- $H_1$  : SSD for mixed Gamma-exponential < SSD for mixed exponentials - accepted,  $p = 0.0029$ .

Additionally, we also evaluated the difference between the three models using the Akaike Information Criterion (AIC) and the Bayesian Information Criterion (BIC). These criteria are used to measure the tradeoff between the number of parameters and the goodness of fit of the model to the data.

Given an ISI dataset  $\{ISI_k\}_{k=1}^N$ , sorted from shortest to longest and  $N$  denoting the number of ISIs in the dataset, we define the empirical CDF as a piecewise linear function such that

$$F_{data}(ISI_k) = \frac{k}{N}. \quad (S6)$$

Denoting the model CDF as  $F(t)$ , we evaluated values of  $F(t)$  at each  $ISI_k$ . The goodness of fit is measured using the log-likelihood function,

$$LL = -N \cdot \ln(\sqrt{2\pi}) - N \ln(\sigma) - \sum_{k=1}^N \frac{(F(ISI_k) - F_{data}(ISI_k))^2}{2\sigma^2}, \quad (S7)$$

where  $\sigma^2$  represents measurement uncertainty (here taken to be a constant value of 0.1 across all datasets). This likelihood function assumes that all errors are independent and identically distributed with a normal distribution. The AIC and BIC is respectively defined as,

$$AIC = -2 \cdot LL + 2 \cdot K_p, \quad BIC = -2 \cdot LL + K_p \cdot \ln(N), \quad (S8)$$

where  $K_p$  is the number of parameters involved in the model. The same refractory period parameter values (namely  $\lambda_R$  and  $t_{abs}$ ) were used for all three models compared here. Thus, we only counted the number of parameters used in  $f_E(t)$  for  $K_p$ , so  $K_p = 1$  for the exponentially distributed  $f_E(t)$  (case (i)),  $K_p = 3$  for the gamma-exponential mixture (case (ii)), and  $K_p = 3$  for the mixture of two exponentials (case(iii)). We determined which model is most consistent with the data by looking AIC and BIC values. A lower value (more negative) of AIC or BIC indicates a better model. We found that both AIC and BIC gave similar conclusions (see Table 4). In most cases, model (iii) with mixed exponential  $f_E(t)$  is most consistent with the data though there were a few cases where model (i) is deemed most consistent.

### Tables of Data Fitting Results

| Dataset # | $t_{abs}$ (ms) | $1/\lambda_R$ (ms) | $1/\lambda_E$ (ms) | SSD      |
|-----------|----------------|--------------------|--------------------|----------|
| 1         | 2.5000         | 1.0000             | 103.8023           | 14.9960  |
| 2         | 1.5300         | 2.0350             | 85.3971            | 11.5371  |
| 3         | 1.8900         | 5.1875             | 64.2797            | 12.7117  |
| 4         | 1.3500         | 0.1000             | 30.0571            | 67.0271  |
| 5         | 2.5000         | 0.1013             | 85.2152            | 110.3327 |
| 6         | 2.1600         | 1.0000             | 45.2899            | 66.4405  |
| 7         | 2.2500         | 0.7068             | 52.9073            | 14.4063  |
| 8         | 2.5000         | 3.9863             | 105.2665           | 36.9623  |
| 9         | 1.9800         | 2.0546             | 68.7616            | 9.2877   |
| 10        | 2.5000         | 4.8986             | 98.8533            | 19.8469  |
| 11        | 2.4376         | 1.0000             | 50.5663            | 41.7124  |
| 12        | 2.5000         | 4.3005             | 96.8992            | 33.6167  |
| 13        | 1.3997         | 2.3255             | 79.1264            | 18.6114  |
| 14        | 1.0870         | 11.6052            | 85.8959            | 12.7329  |
| 15        | 2.5000         | 10.3001            | 97.6181            | 9.8741   |
| 16        | 2.5000         | 3.1309             | 122.4140           | 23.3867  |
| 17        | 2.0079         | 8.1880             | 55.3747            | 16.6694  |
| 18        | 0.7790         | 7.1572             | 90.5223            | 9.0096   |
| 19        | 2.5000         | 3.4343             | 63.3072            | 27.1732  |
| 20        | 2.5000         | 1.9739             | 90.6865            | 17.2356  |
| 21        | 2.5000         | 3.8392             | 65.1848            | 5.9885   |
| 22        | 2.3788         | 1.0000             | 33.6383            | 69.3876  |
| 23        | 0.7300         | 1.0000             | 86.9112            | 46.4528  |
| 24        | 2.0859         | 5.7215             | 56.1924            | 6.3252   |
| 25        | 2.4239         | 1.4399             | 76.2428            | 7.0868   |
| 26        | 1.9113         | 0.1000             | 100.4803           | 68.0964  |

**Table S1.** Best-fit parameter values for case (i) with exponentially distributed  $f_E(t)$ . SSD denote the sum of square difference,  $SSD = \sum_{k=1}^N (F(ISI_k) - F_{data}(ISI_k))^2$ .

| Dataset # | $t_{abs}$ (ms) | $1/\lambda_R$ (ms) | $1/\lambda_E$ (ms) | $n$ (shape) | $p$ (fraction exp) | SSD      |
|-----------|----------------|--------------------|--------------------|-------------|--------------------|----------|
| 1         | 2.5000         | 1.0000             | 95.4563            | 5.5339      | 0.9637             | 22.6599  |
| 2         | 1.5300         | 2.0350             | 84.3668            | 3.0757      | 0.9975             | 20.6141  |
| 3         | 1.8900         | 5.1875             | 64.2839            | 1.5721      | 0.9679             | 30.8084  |
| 4         | 1.3500         | 0.1000             | 25.0884            | 2.7713      | 0.8725             | 66.0503  |
| 5         | 2.5000         | 0.1013             | 69.9545            | 6.7263      | 0.8818             | 65.3558  |
| 6         | 2.1600         | 1.0000             | 41.2201            | 3.1396      | 0.8999             | 47.0824  |
| 7         | 2.2500         | 0.7068             | 44.5355            | 1.7351      | 0.7849             | 11.3063  |
| 8         | 2.5000         | 3.9863             | 76.0861            | 4.8635      | 0.8812             | 65.4366  |
| 9         | 1.9800         | 2.0546             | 57.6170            | 2.6005      | 0.8586             | 36.6013  |
| 10        | 2.5000         | 4.8986             | 98.6680            | 5.0442      | 0.9915             | 334.8282 |
| 11        | 2.4376         | 1.0000             | 51.9561            | 1.4064      | 0.9997             | 30.5427  |
| 12        | 2.5000         | 4.3005             | 89.7908            | 5.1367      | 0.9525             | 29.2498  |
| 13        | 1.3997         | 2.3255             | 76.3475            | 5.1744      | 0.9796             | 14.2559  |
| 14        | 1.0870         | 11.6052            | 89.6941            | 1.3458      | 0.9972             | 44.6663  |
| 15        | 2.5000         | 10.3001            | 98.5804            | 1.1613      | 0.5770             | 248.1164 |
| 16        | 2.5000         | 3.1309             | 122.8094           | 2.7397      | 0.9601             | 32.5143  |
| 17        | 2.0079         | 8.1880             | 54.7375            | 1.1121      | 0.3103             | 48.9654  |
| 18        | 0.7790         | 7.1572             | 90.2446            | 1.3355      | 0.9748             | 12.8438  |
| 19        | 2.5000         | 3.4343             | 58.1598            | 2.5551      | 0.9258             | 31.5468  |
| 20        | 2.5000         | 1.9739             | 79.6686            | 3.6880      | 0.9411             | 15.9124  |
| 21        | 2.5000         | 3.8392             | 65.8979            | 2.9681      | 0.9971             | 32.3334  |
| 22        | 2.3788         | 1.0000             | 27.8033            | 6.3103      | 0.8901             | 22.3474  |
| 23        | 0.7300         | 1.0000             | 73.5998            | 3.0517      | 0.8820             | 40.4161  |
| 24        | 2.0859         | 5.7215             | 58.6992            | 1.0071      | 0.9970             | 46.7645  |
| 25        | 2.4239         | 1.4399             | 68.5965            | 3.5201      | 0.9386             | 18.0411  |
| 26        | 1.9113         | 0.1000             | 87.9430            | 4.0820      | 0.9324             | 49.8319  |

**Table S2.** Best-fit parameter values for case (ii) with mixed gamma-exponential  $f_E(t)$ . SSD denote the sum of square difference,  $SSD = \sum_{k=1}^N (F(ISI_k) - F_{data}(ISI_k))^2$ .

| Dataset # | $t_{abs}$ (ms) | $1/\lambda_R$ (ms) | $1/\lambda_{E1}$ (ms) | $1/\lambda_{E2}$ (ms) | $p_1$ fraction from source 1 | SSD     |
|-----------|----------------|--------------------|-----------------------|-----------------------|------------------------------|---------|
| 1         | 2.5000         | 1.0000             | 86.5052               | 167.2800              | 0.7192                       | 7.2974  |
| 2         | 1.5300         | 2.0350             | 21.2770               | 86.3707               | 0.0101                       | 10.9590 |
| 3         | 1.8900         | 5.1875             | 63.4518               | 114.8000              | 0.9775                       | 12.6090 |
| 4         | 1.3500         | 0.1000             | 16.6083               | 85.2152               | 0.6159                       | 18.0682 |
| 5         | 2.5000         | 0.1013             | 36.1141               | 239.4464              | 0.5311                       | 28.9722 |
| 6         | 2.1600         | 1.0000             | 16.8848               | 75.5116               | 0.3576                       | 9.4812  |
| 7         | 2.2500         | 0.7068             | 52.9073               | 55.9003               | 1.0000                       | 14.4063 |
| 8         | 2.5000         | 3.9863             | 86.0585               | 340.5995              | 0.8349                       | 21.5973 |
| 9         | 1.9800         | 2.0546             | 68.7569               | 68.7616               | 0.0277                       | 9.2877  |
| 10        | 2.5000         | 4.8986             | 98.8533               | 98.8533               | 0.1244                       | 19.8469 |
| 11        | 2.4376         | 1.0000             | 8.1773                | 59.1891               | 0.1087                       | 6.1058  |
| 12        | 2.5000         | 4.3005             | 81.5461               | 369.4809              | 0.8663                       | 22.9696 |
| 13        | 1.3997         | 2.3255             | 74.2776               | 961.3536              | 0.9615                       | 12.0821 |
| 14        | 1.0870         | 11.6052            | 82.0749               | 237.3042              | 0.9531                       | 11.1667 |
| 15        | 2.5000         | 10.3001            | 95.0209               | 4016.8709             | 0.9851                       | 9.1513  |
| 16        | 2.5000         | 3.1309             | 104.2992              | 295.7705              | 0.8355                       | 14.0650 |
| 17        | 2.0079         | 8.1873             | 55.3741               | 55.3741               | 0.1045                       | 16.6695 |
| 18        | 0.7790         | 7.1572             | 88.3080               | 446.1895              | 0.9811                       | 7.6650  |
| 19        | 2.5000         | 3.4343             | 54.0979               | 157.5274              | 0.8419                       | 18.7378 |
| 20        | 2.5000         | 1.9739             | 82.9394               | 315.8859              | 0.9233                       | 10.9598 |
| 21        | 2.5000         | 3.8392             | 65.1806               | 65.3424               | 0.9826                       | 5.9885  |
| 22        | 2.3788         | 1.0000             | 10.6168               | 51.1876               | 0.2919                       | 13.0114 |
| 23        | 0.7300         | 1.0000             | 63.5526               | 217.9029              | 0.7291                       | 25.6208 |
| 24        | 2.0859         | 5.7215             | 56.1703               | 57.0679               | 0.9745                       | 6.3252  |
| 25        | 2.4239         | 1.4399             | 74.8167               | 1758.7056             | 0.9892                       | 5.8784  |
| 26        | 1.9113         | 0.1000             | 50.3195               | 228.3939              | 0.5347                       | 11.4158 |

**Table S3.** Best-fit parameter values for case (iii) with mixed exponentials  $f_E(t)$ . SSD denote the sum of square difference,  $SSD = \sum_{k=1}^N (F(ISI_k) - F_{data}(ISI_k))^2$ .

| Dataset # | AIC       |            |             |              | BIC       |            |             |              |
|-----------|-----------|------------|-------------|--------------|-----------|------------|-------------|--------------|
|           | Model (i) | Model (ii) | Model (iii) | AIC decision | Model (i) | Model (ii) | Model (iii) | BIC decision |
| 1         | -5995.5   | -6090.2    | -6226.4     | (iii)        | -5974.7   | -6073.4    | -6209.6     | (iii)        |
| 2         | -6143.4   | -5797.7    | -6178.1     | (iii)        | -6122.6   | -5780.8    | -6161.3     | (iii)        |
| 3         | -6055.6   | -5704      | -6065.7     | (iii)        | -6034.8   | -5687.2    | -6048.9     | (iii)        |
| 4         | -4750.9   | -4793.3    | -6014.4     | (iii)        | -4730.1   | -4776.4    | -5997.6     | (iii)        |
| 5         | -4143.8   | -5115.8    | -6119.2     | (iii)        | -4123     | -5099      | -6102.4     | (iii)        |
| 6         | -4801.7   | -5282.3    | -6095.1     | (iii)        | -4780.9   | -5265.5    | -6078.3     | (iii)        |
| 7         | -6144.8   | -6035.1    | -6140.8     | (i)          | -6124     | -6018.3    | -6124       | (i)          |
| 8         | -5661.4   | -5775.6    | -6186.9     | (iii)        | -5640.6   | -5758.8    | -6170.1     | (iii)        |
| 9         | -6157.1   | -5818.7    | -6153.1     | (i)          | -6136.3   | -5801.9    | -6136.3     | (i)          |
| 10        | -6070.1   | -2136.2    | -6066.1     | (i)          | -6049.3   | -2119.4    | -6049.3     | (i) or (iii) |
| 11        | -5316.8   | -5595.2    | -6192.5     | (iii)        | -5296     | -5578.4    | -6175.7     | (iii)        |
| 12        | -5692.1   | -6021.7    | -6140.4     | (iii)        | -5671.3   | -6004.9    | -6123.6     | (iii)        |
| 13        | -5921.5   | -6014.6    | -6158.9     | (iii)        | -5900.7   | -5997.8    | -6142.1     | (iii)        |
| 14        | -6105.8   | -6013.2    | -6187.1     | (iii)        | -6085     | -5996.4    | -6170.3     | (iii)        |
| 15        | -6068.3   | -2939.9    | -6150.4     | (iii)        | -6047.5   | -2923.1    | -6133.6     | (iii)        |
| 16        | -5873.5   | -5842.3    | -6199       | (iii)        | -5852.7   | -5825.5    | -6182.2     | (iii)        |
| 17        | -6005.4   | -5995.4    | -6001.4     | (i)          | -5984.6   | -5978.6    | -5984.6     | (i) or (iii) |
| 18        | -6062.4   | -5867      | -6124.1     | (iii)        | -6041.7   | -5850.2    | -6107.3     | (iii)        |
| 19        | -5844.5   | -5770.8    | -6159.8     | (iii)        | -5823.7   | -5754      | -6143       | (iii)        |
| 20        | -5969.2   | -6156.6    | -6195.5     | (iii)        | -5948.4   | -6139.8    | -6178.7     | (iii)        |
| 21        | -6182.1   | -6161.4    | -6178.1     | (i)          | -6161.3   | -6144.6    | -6161.3     | (i) or (iii) |
| 22        | -4772.5   | -6048.6    | -6070.9     | (iii)        | -4751.7   | -6031.8    | -6054.1     | (iii)        |
| 23        | -5469.5   | -5680.9    | -6147       | (iii)        | -5448.7   | -5664.1    | -6130.2     | (iii)        |
| 24        | -6180.2   | -5488.3    | -6176.2     | (i)          | -6159.4   | -5471.5    | -6159.4     | (i) or (iii) |
| 25        | -6133.7   | -5928.6    | -6196.8     | (iii)        | -6112.9   | -5911.8    | -6180       | (iii)        |
| 26        | -4802.5   | -5179.6    | -6185       | (iii)        | -4781.7   | -5162.8    | -6168.2     | (iii)        |

**Table S4.** AIC and BIC for the three models.

## Additional Figures

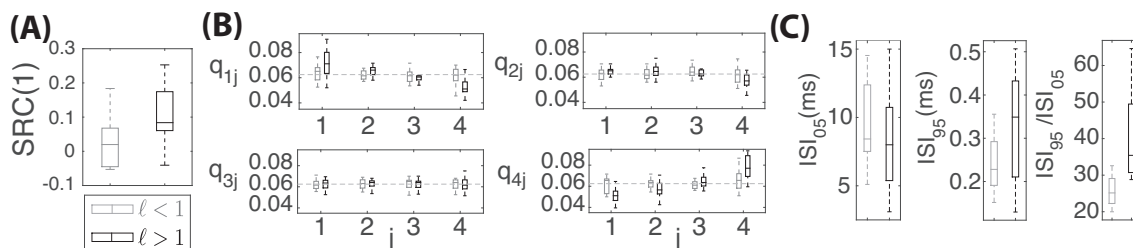

**Figure S1. Increase in serial dependencies for ISI data with L-shaped distribution ( $\ell > 1$ ).** (A) Box plot of SRCs for data sets with  $\ell < 1$  and  $\ell > 1$ . (B) Comparisons of entries of renewal quartile matrix  $q_{ij}$ . (C) Measurements of short ISI values (5th-percentile,  $ISI_{05}$ ), long ISI values (95th-percentile,  $ISI_{95}$ ), and the ratio between the two.

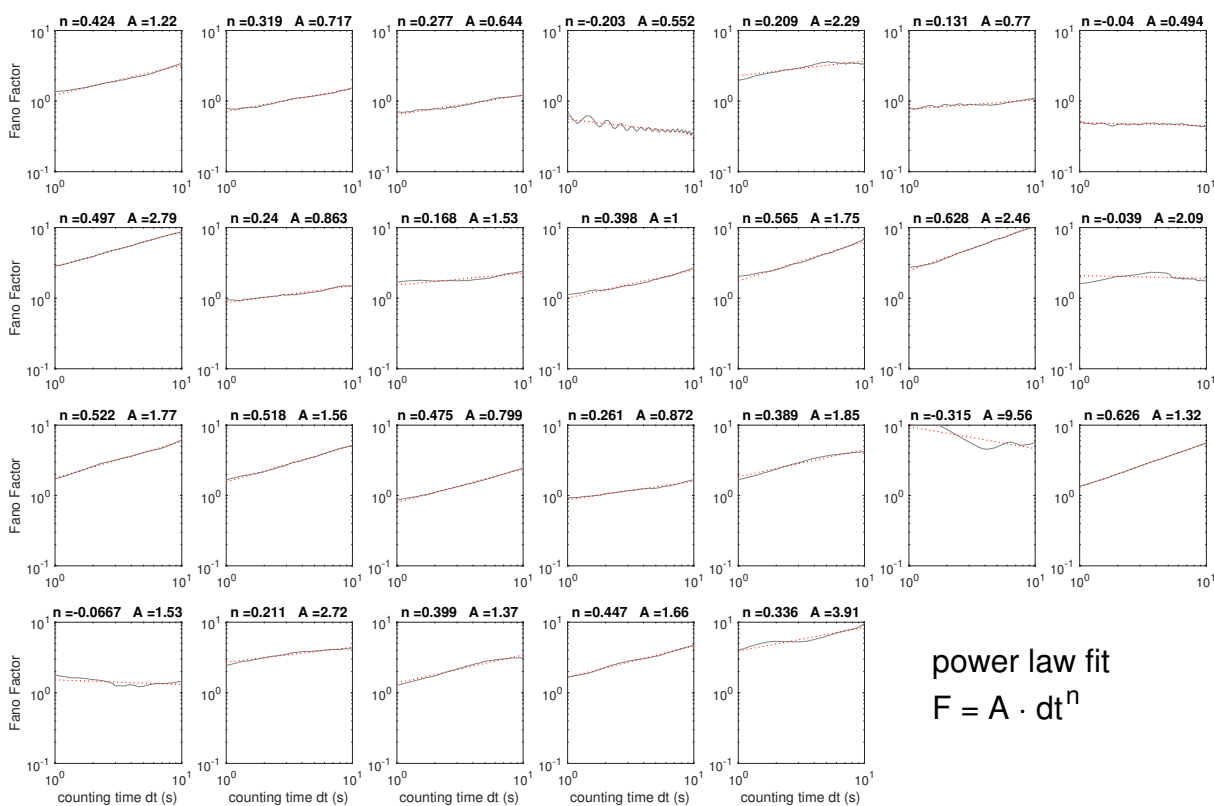

**Figure S2. Fano factor dependencies over counting time  $dt$  fitted to a power law relationship  $F = A \cdot dt^n$ .**

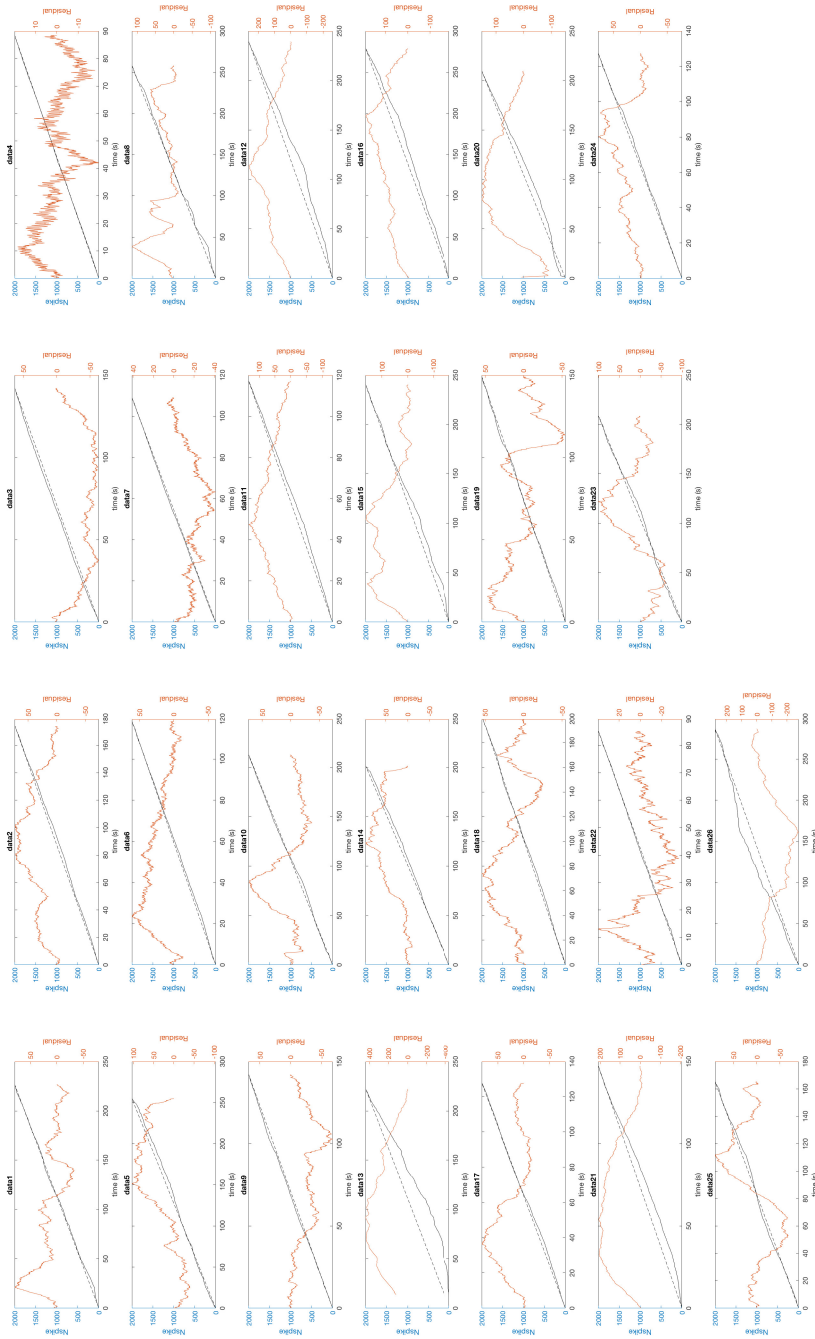

**Figure S3.** Comparison of spike count data (solid black line) to a Poisson process (dashed black line) with a linear spike count over time ( $N_{spike} = \lambda t$  where  $\lambda$  is the spike rate ( $\lambda = 1/\text{mean ISI}$  for fitting here). The difference between the model and the Poisson approximation is shown as the residual curve in red (see<sup>2</sup> Figure 4B for similar analysis).



## Histograms of Data Sets

SRC values listed on histograms on Figs. S4-S6 corresponds to lag  $n = 1$ , ( $SRC(1)$ ).

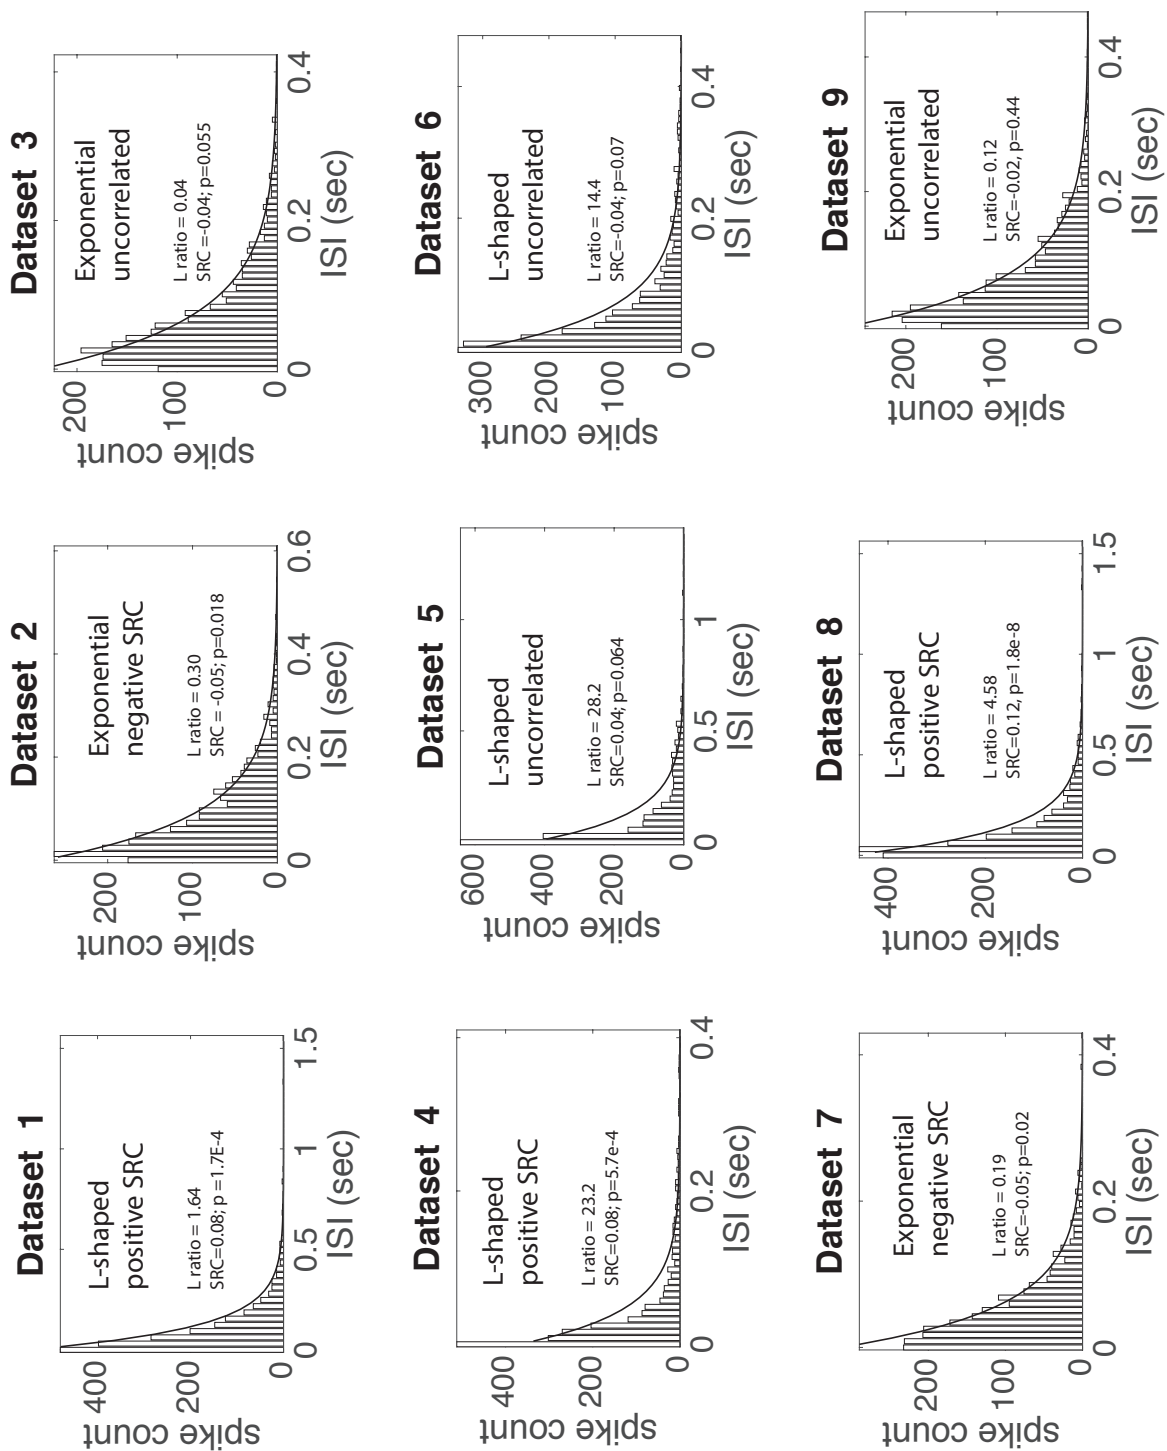

Figure S4. Histogram of Data Sets 1-9

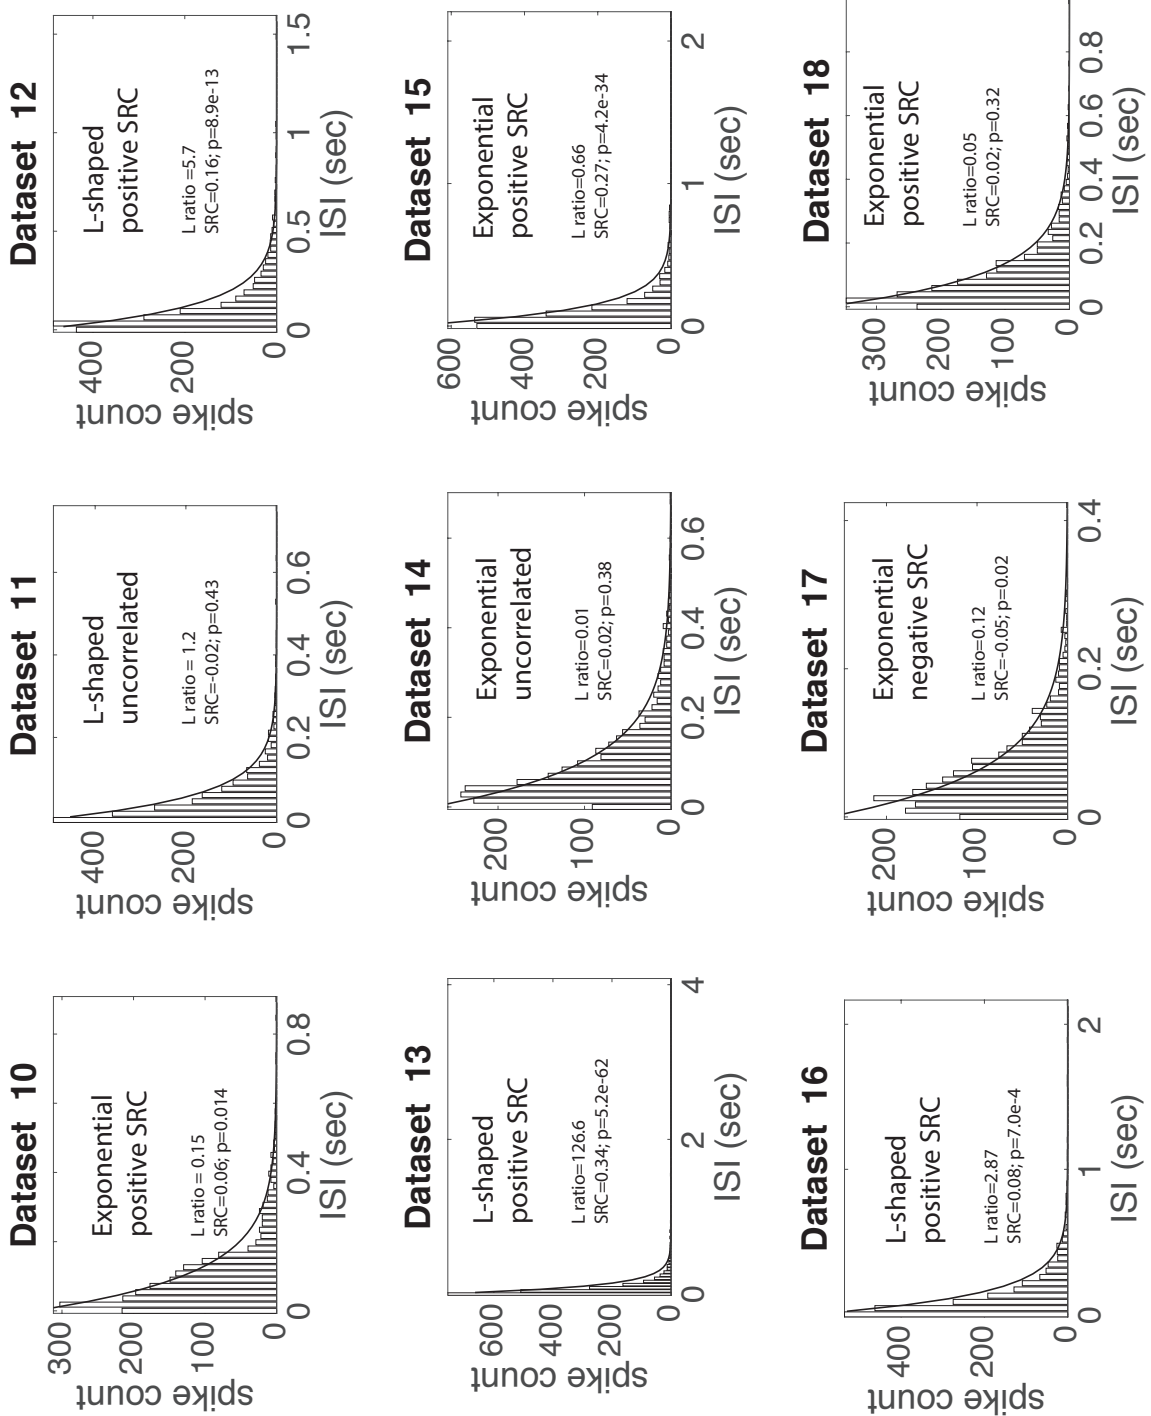

Figure S5. Histogram of Data Sets 10-18

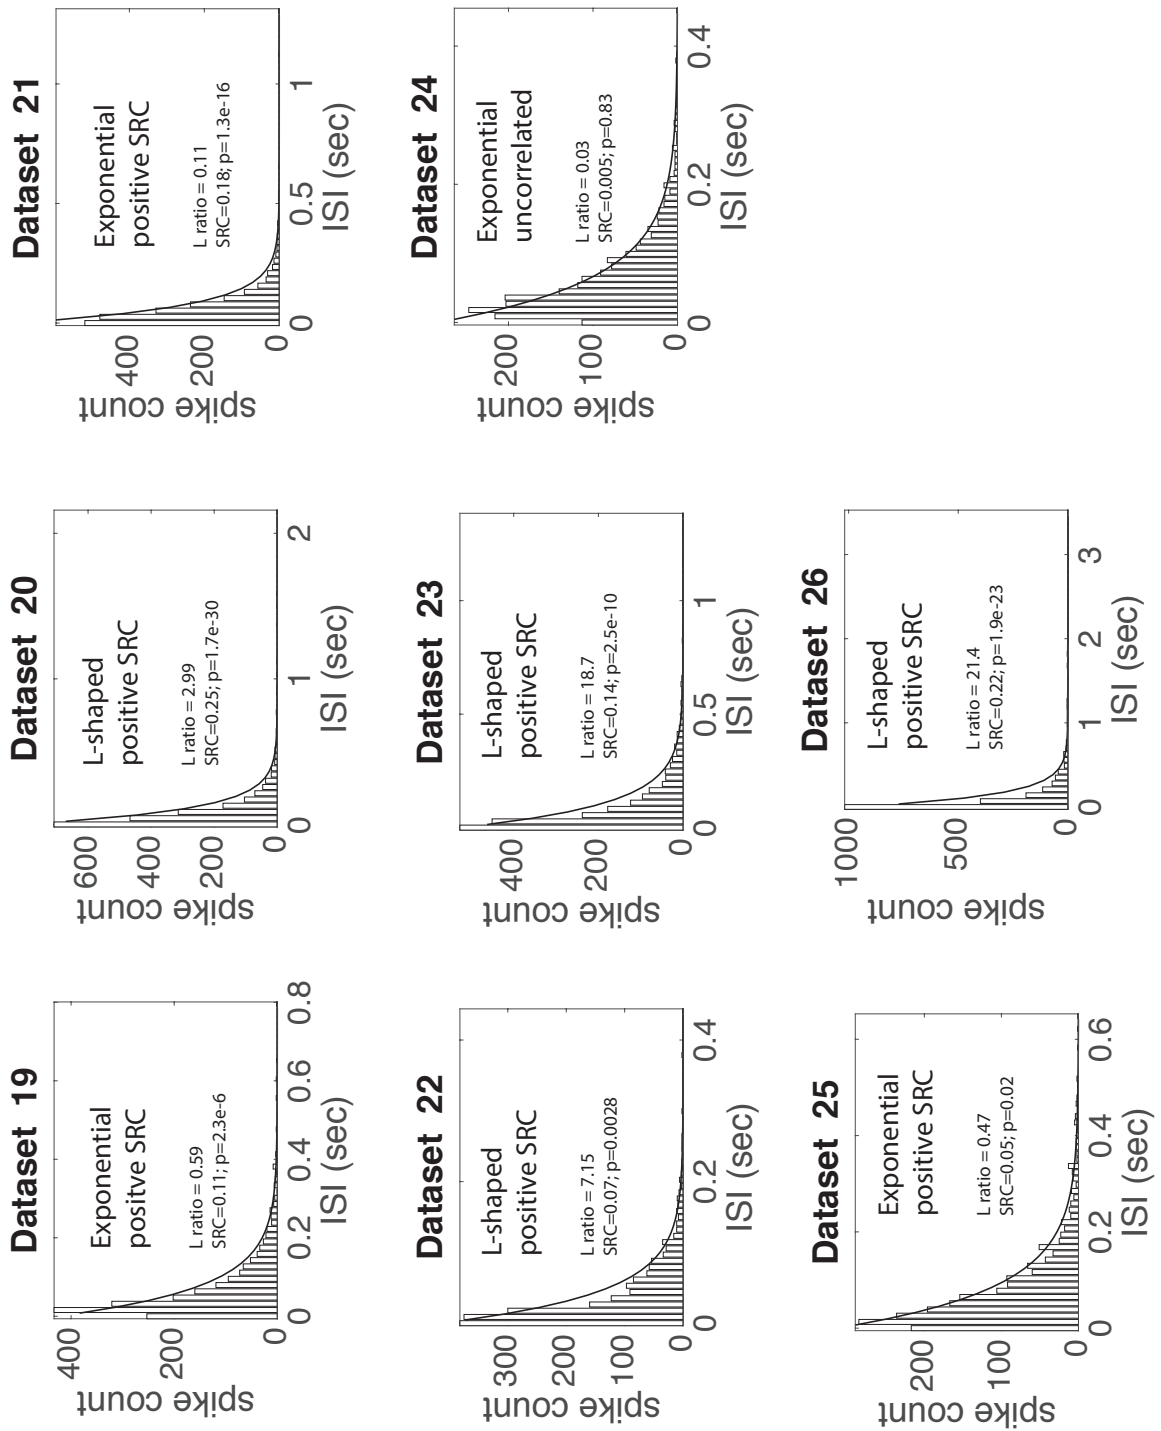

**Figure S6.** Histogram of Data Sets 19-26
